# Supplementary material
Source: Springer Nature journal article supplement (https://www.springermedizin.de/resource/supplementary/12885_2012_3897_MOESM7_ESM.pdf/9464550)

**A**

CD31

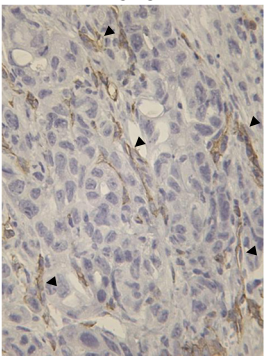**B**

% CD31-positive intratumoral staining

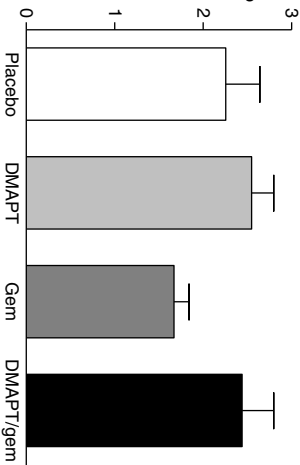**C**

Masson's Trichrome

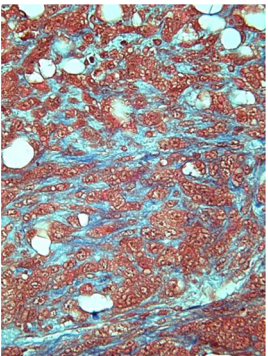**D**

% collagen staining

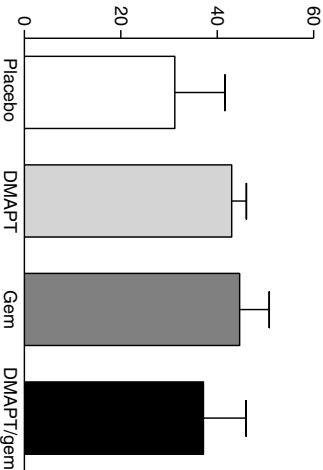

Supplement: MOESM7 [file 9464550]
